# Supplementary material for: Mutation hotspots at CTCF binding sites coupled to chromosomal instability in gastrointestinal cancers
Source: PubMed Central journal article supplement (PMC5906695; doi:10.1038/s41467-018-03828-2), 2018-04-18
Supplement: 41467_2018_3828_MOESM1_ESM.pdf [file 41467_2018_3828_MOESM1_ESM.pdf]

**Supplementary Information for:**

**Mutation hotspots at CTCF binding sites coupled to chromosomal instability in gastrointestinal cancers**

Yu Amanda Guo<sup>1</sup>, Mei Mei Chang<sup>1</sup>, Weitai Huang<sup>1,2</sup>, Wen Fong Ooi<sup>3</sup>, Manjie Xing<sup>3,4</sup>, Patrick Tan<sup>4,5</sup> & Anders Jacobsen Skanderup<sup>1</sup>

<sup>1</sup>Computational & Systems Biology, Genome Institute of Singapore, Agency for Science, Technology and Research, Singapore 138672

<sup>2</sup>Graduate School of Integrative Sciences and Engineering, National University of Singapore, Singapore 117456

<sup>3</sup>Cancer Therapeutics and Stratified Oncology, Genome Institute of Singapore, Agency for Science, Technology and Research, Singapore 138672

<sup>4</sup>Cancer and Stem Cell Biology Program, Duke-NUS Medical School, Singapore 169857

<sup>5</sup>Cancer Science Institute of Singapore, National University of Singapore, Singapore 117599

Correspondence should be addressed to A.J.S. ([skanderupamj@gis.a-star.edu.sg](mailto:skanderupamj@gis.a-star.edu.sg)) and P.T. ([tanbop@gis.a-star.edu.sg](mailto:tanbop@gis.a-star.edu.sg)).



**Supplementary Figure 1** Summary of mutation data of 212 gastric cancer genomes.

**(a)** A total of 212 gastric cancer whole genome sequences were collated from 4 sources and uniformly processed to obtain high-confidence somatic mutation calls.

**(b)** Mutation count and coverage of individual tumors from the 4 cohorts. **(c)**

Individual samples were plotted by their mutation counts on the y-axis against the fractions of C.G>A.T mutations on the x-axis. Samples are colored by their source.

Seven samples were removed due to data corruption. Thirteen tumors with low mutation counts were removed, as these are likely low-quality samples. Finally, 5

samples showing signature of oxidative DNA damage (high fraction of C.G>A.T mutations) were removed. **(d)** The mutation spectrums of tumors from the 4 cohorts

are similar after uniform alignment and mutation calling.

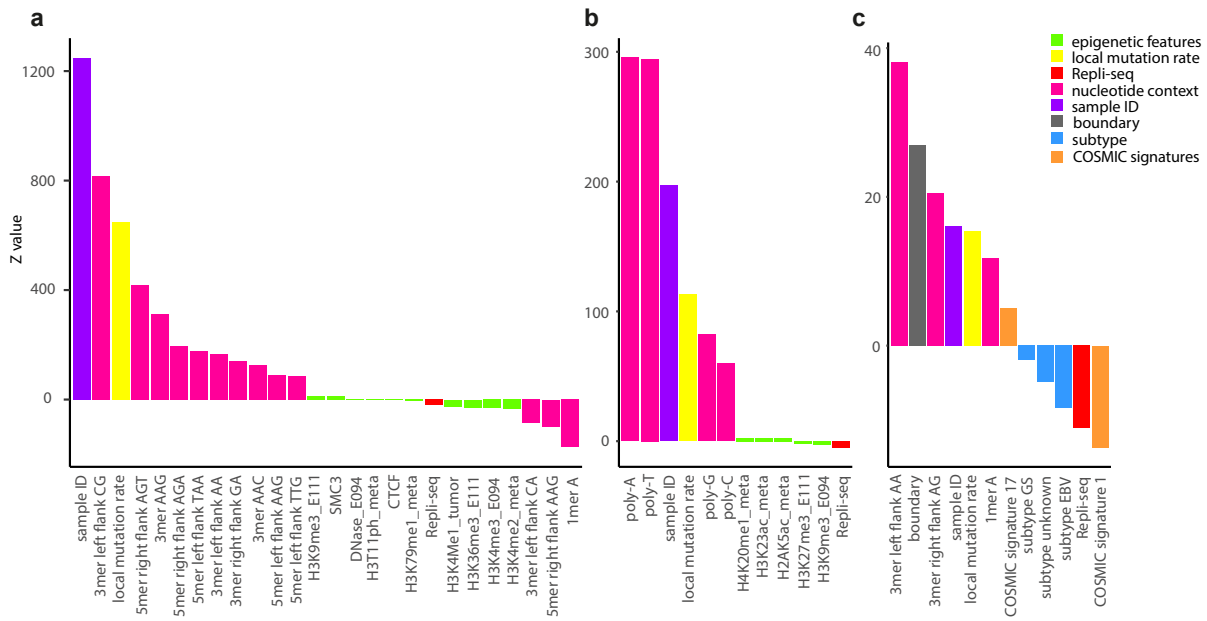

**Supplementary Figure 2** Features used in each background mutation model. Sequence and epigenetic features that are most correlated with somatic mutation rates were selected by LASSO regression. Selected features in the **(a)** SNV background model, **(b)** indel background model, and **(c)** CBS-specific background model.

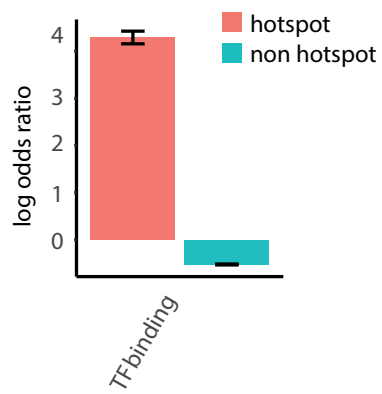

**Supplementary Figure 3** Log odds ratio of the enrichment of hotspot mutations and non-hotspot mutations in constitutive transcription factor binding regions. Error bars indicate the s.e.m of the log odds ratio.

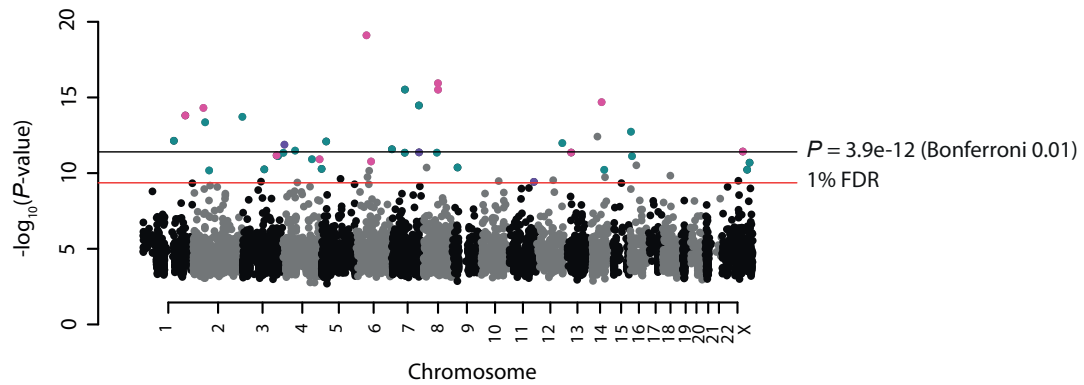

**Supplementary Figure 4** Mutation hotspot analysis using 41bp windows. The negative log P-values of SNV recurrence for all 41bp regions genome-wide, only regions with at least 3 mutations are displayed. CBS hotspots previously identified with 21-bp windows are highlight in magenta; Non-CBS hotspots previously identified are highlighted in green. Three additional significantly mutated CBSs identified by the CBS-specific model are highlighted in purple. The horizontal lines mark the Bonferroni adjusted P-values of 0.01 and 1% FDR respectively.

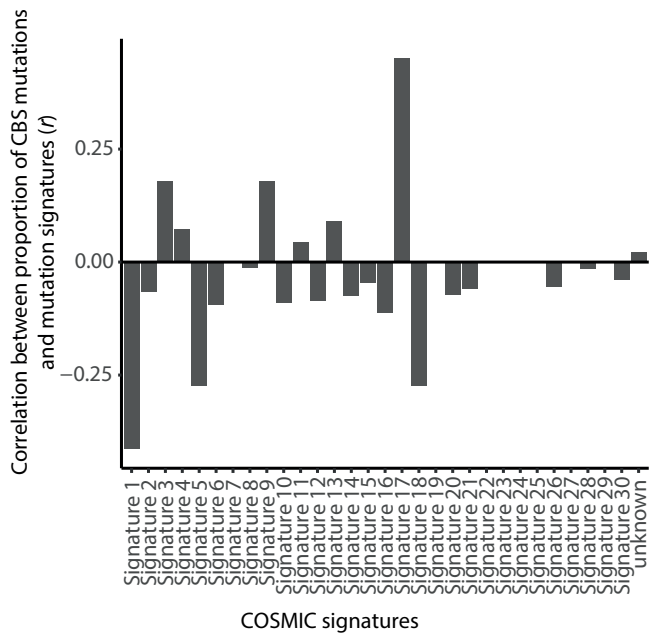

**Supplementary Figure 5** Correlation between CBS mutation rate of each sample with COSMIC signatures.

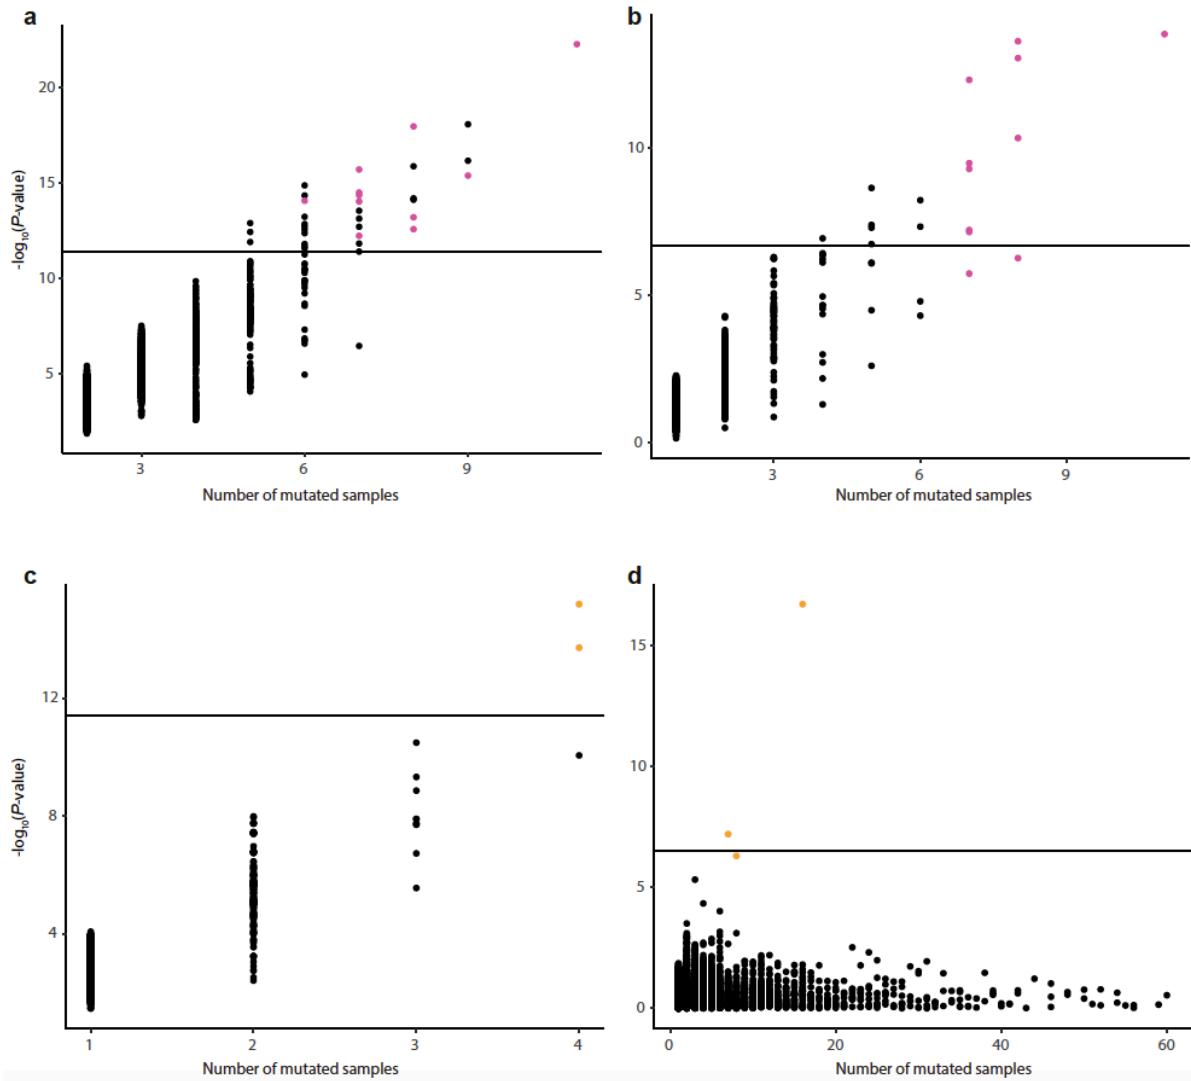

**Supplementary Figure 6** Negative log P-values of mutation recurrence plotted against the number of mutated samples in each non-coding region. **(a)** Genome-wide SNV hotspot model. Significantly mutated hotspots overlapping CBSs are highlighted. **(b)** CBS-specific model. CBS hotspots identified in **(a)** are highlighted. **(c)** Genome-wide indel hotspot model. 2 significantly mutated regions are highlighted. **(d)** Gene-based indel recurrence model. 3 significantly mutated genes are highlighted.



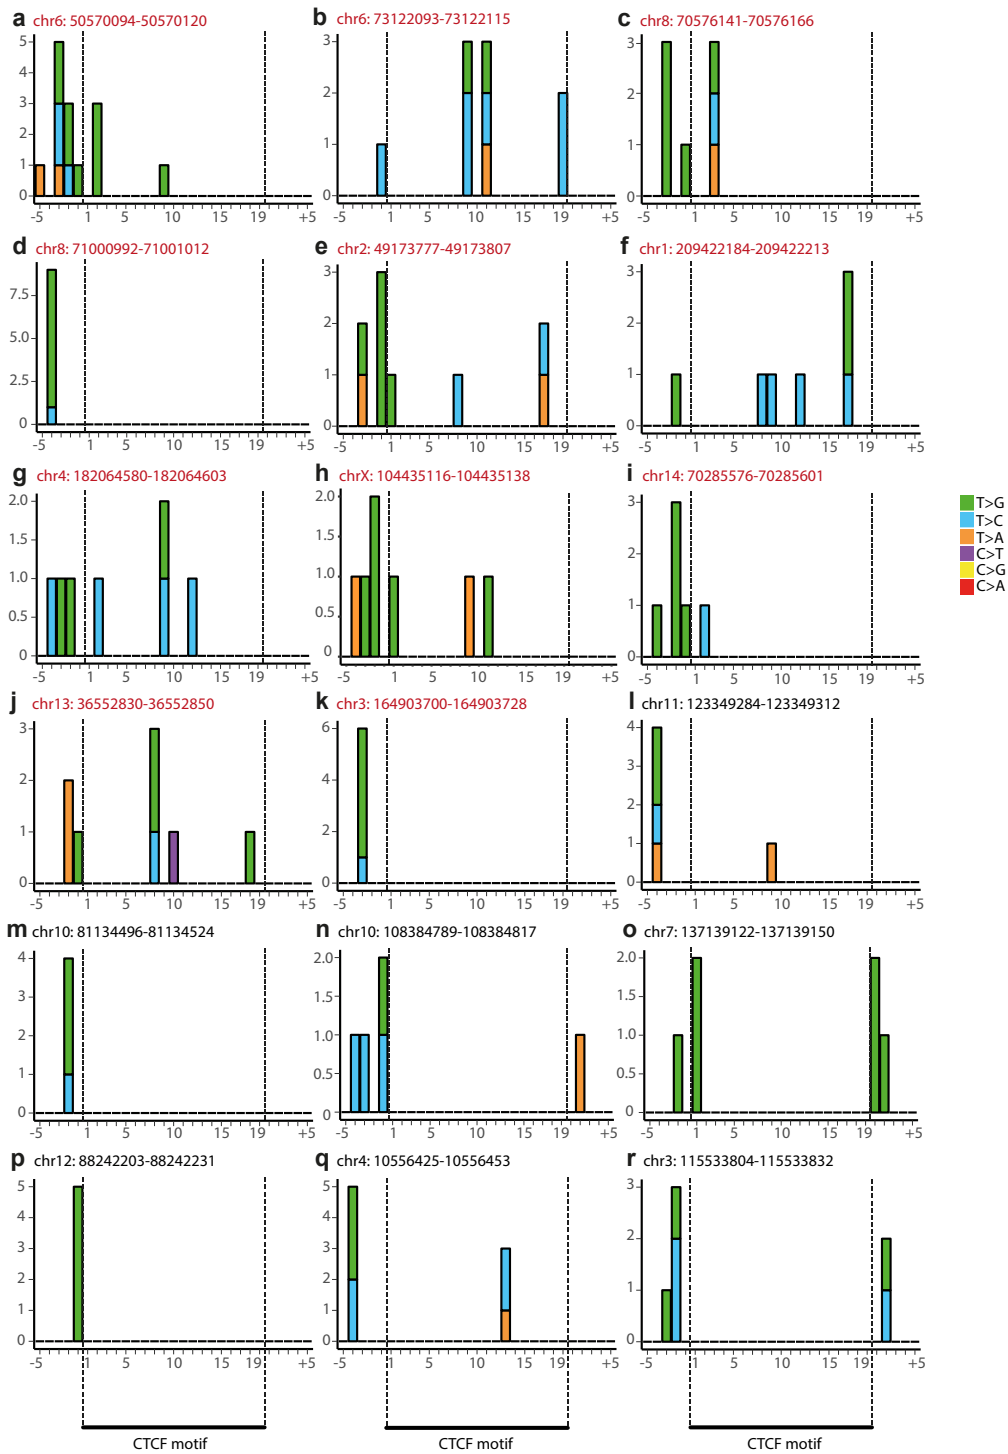

**Supplementary Figure 7** Distribution of mutations within each CBS hotspot. **(a-r)**

Somatic substitution patterns within each CBS hotspot. CBS hotspots identified from genome-wide analysis of non-coding SNV hotspots are highlighted in red. y-axis shows the mutation count and x-axis shows the position relative to CTCF motif.

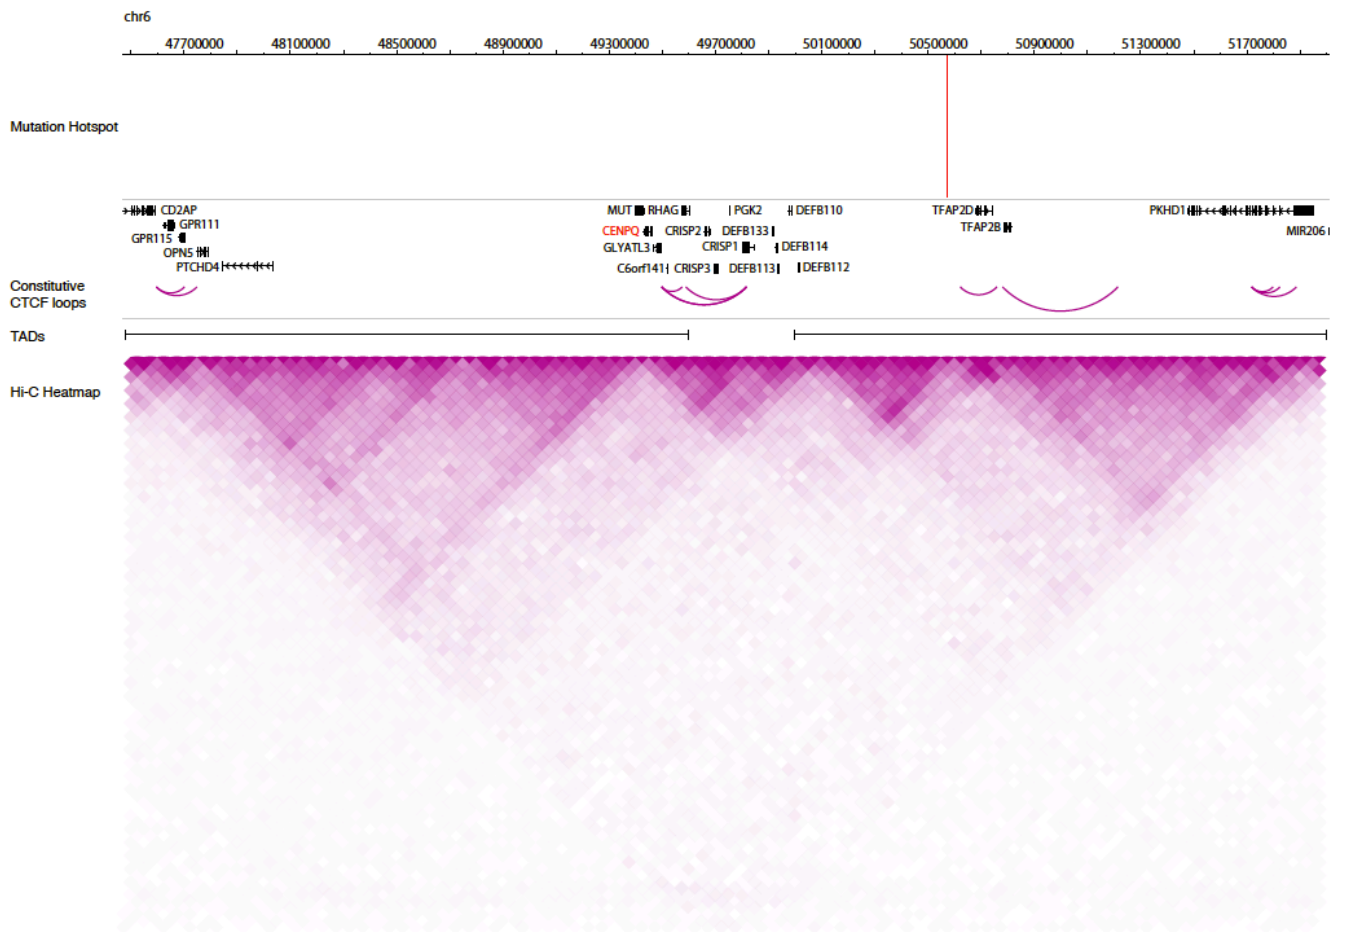

**Supplementary Figure 8** Chromatin neighborhood of CBS hotspot at chr6:50570094-50570120. Candidate gene with expression change associated with the mutation status of the hotspot is highlighted in red. The magenta arcs represent constitutive CTCF loops defined by Hnisz et al., *Science*, 2016. The heatmap shows the normalized Hi-C interaction frequencies in IMR90 cells (Dixon et al., *Nature*, 2012). TADs were called by Dixon et al., *Nature*, 2012.

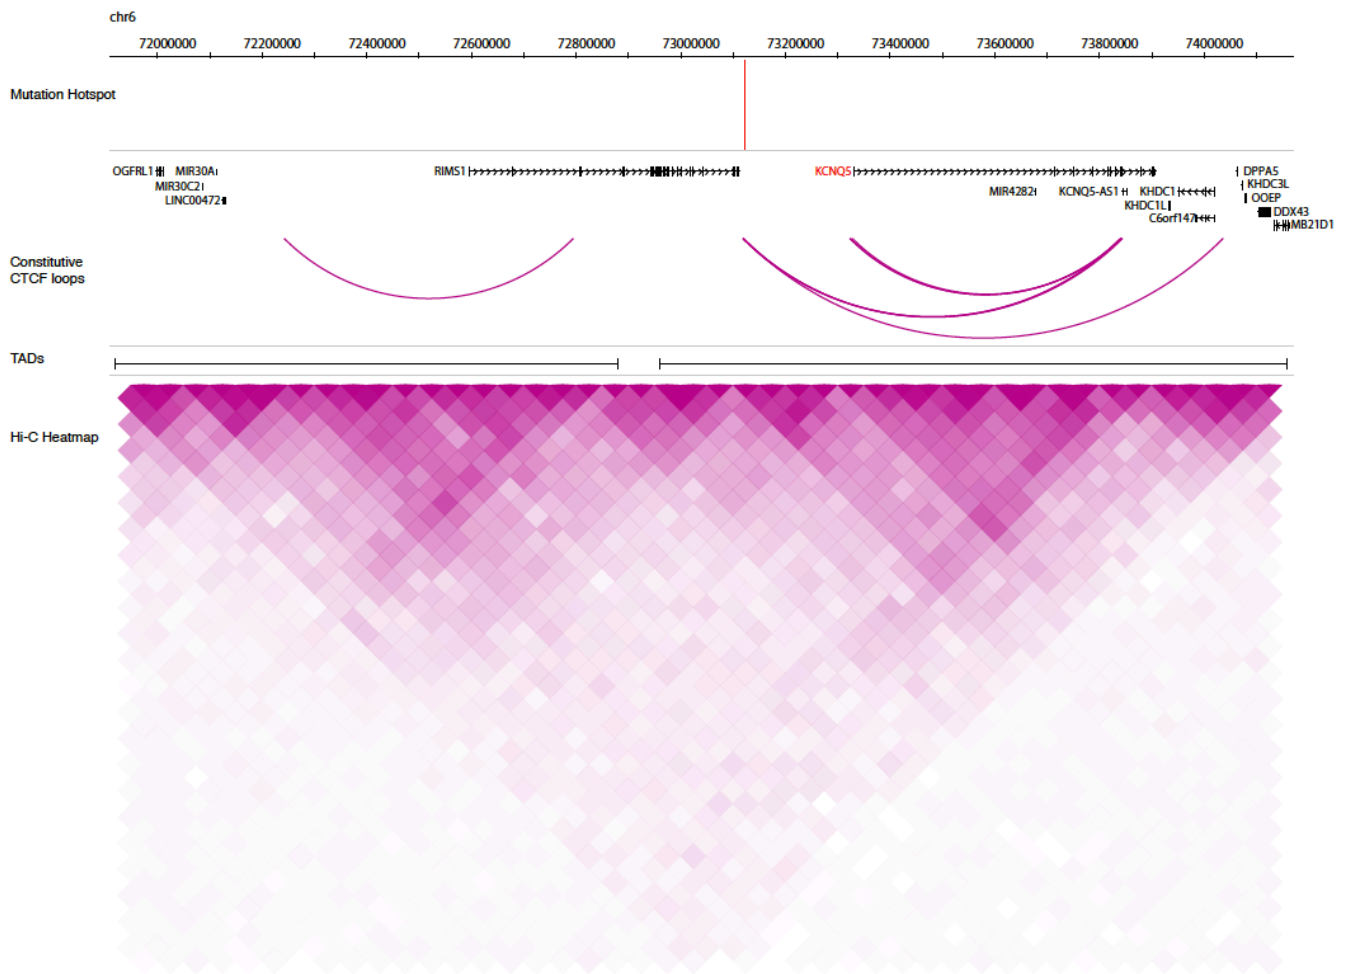

**Supplementary Figure 9** Chromatin neighborhood of CBS hotspot at chr6:73122084-73122123. Candidate gene with expression change associated with the mutation status of the hotspot is highlighted in red. The magenta arcs represent constitutive CTCF loops defined by Hnisz et al., *Science*, 2016. The heatmap shows the normalized Hi-C interaction frequencies in IMR90 cells (Dixon et al., *Nature*, 2012). TADs were called by Dixon et al., *Nature*, 2012.

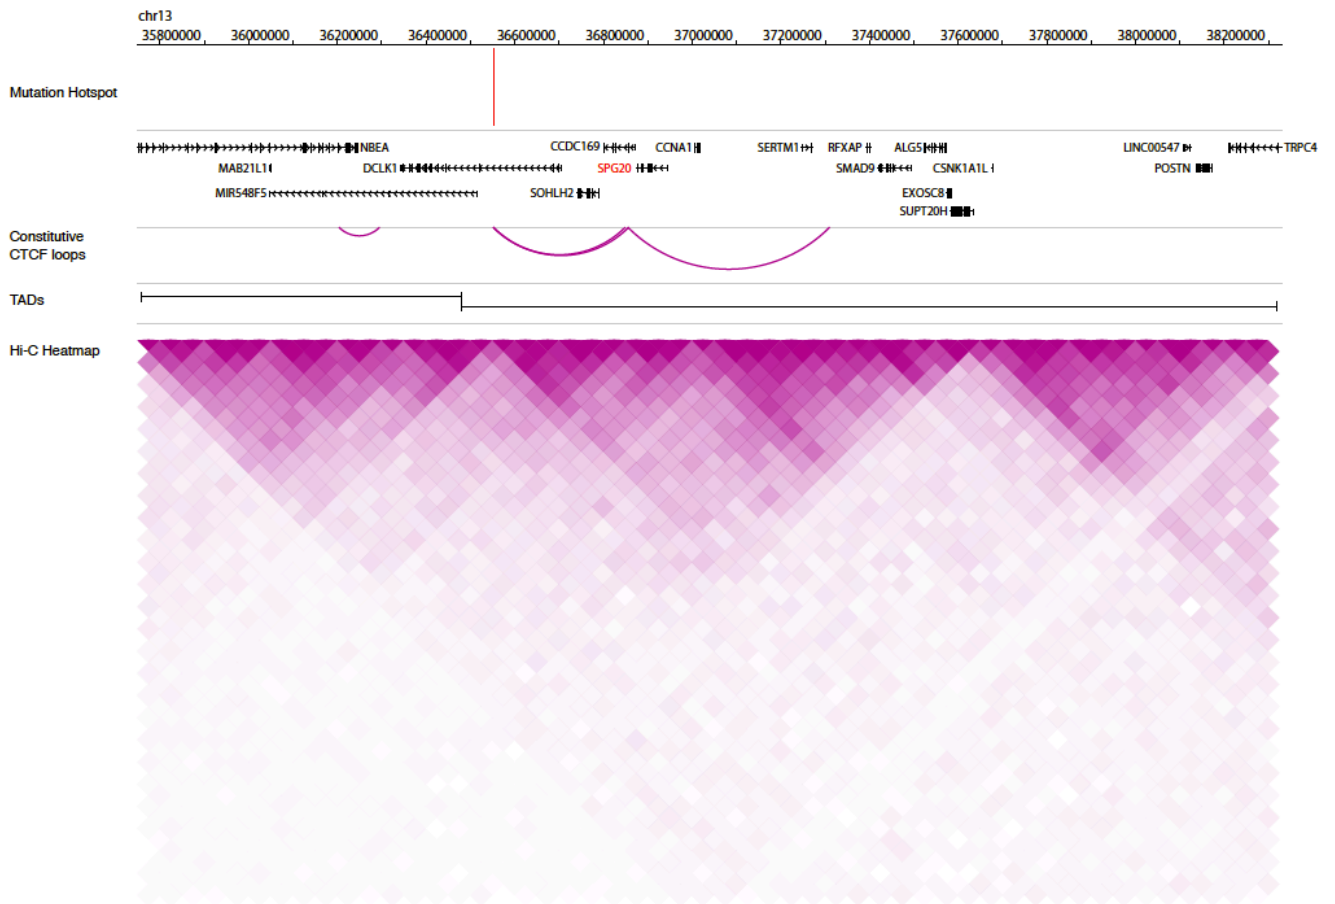

**Supplementary Figure 10** Chromatin neighborhood of CBS hotspot at chr13:36552821-36552860. Candidate gene with expression change associated with the mutation status of the hotspot is highlighted in red. The magenta arcs represent constitutive CTCF loop defined by Hnisz et al., *Science*, 2016. The heatmap shows the normalized Hi-C interaction frequencies in IMR90 cells (Dixon et al., *Nature*, 2012). TADs were called by Dixon et al., *Nature*, 2012.

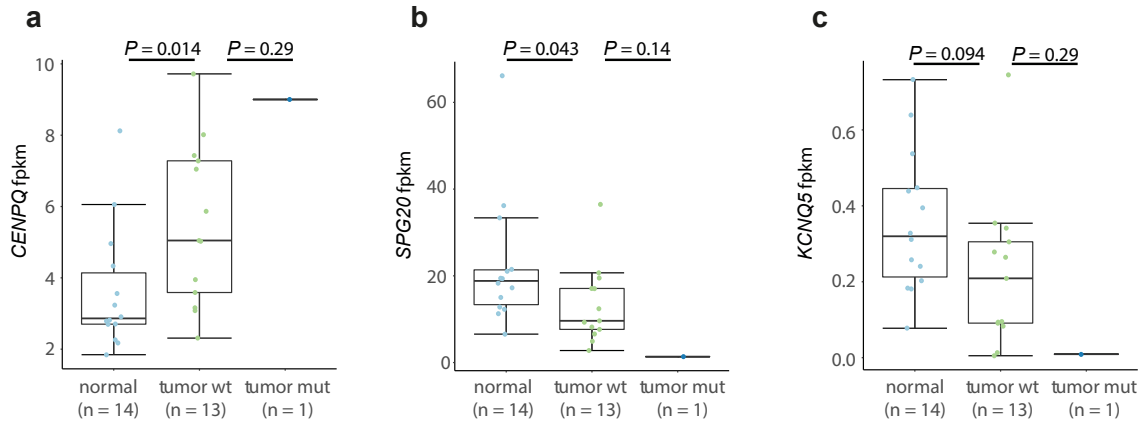

**Supplementary Figure 11** Correlation between CBS hotspot mutations and expression of candidate genes using expression data from 14 tumors of the Singapore cohort. **(a-c)** The gene expressions of *CENPQ* **(a)**, *KCNQ5* **(b)** and *SPG20* **(c)** in matched normal gastric tissue, tumors wildtype at the corresponding CBS hotspot and tumors mutated at the corresponding CBS hotspot. Wilcoxon rank-sum test *P*-values are shown.

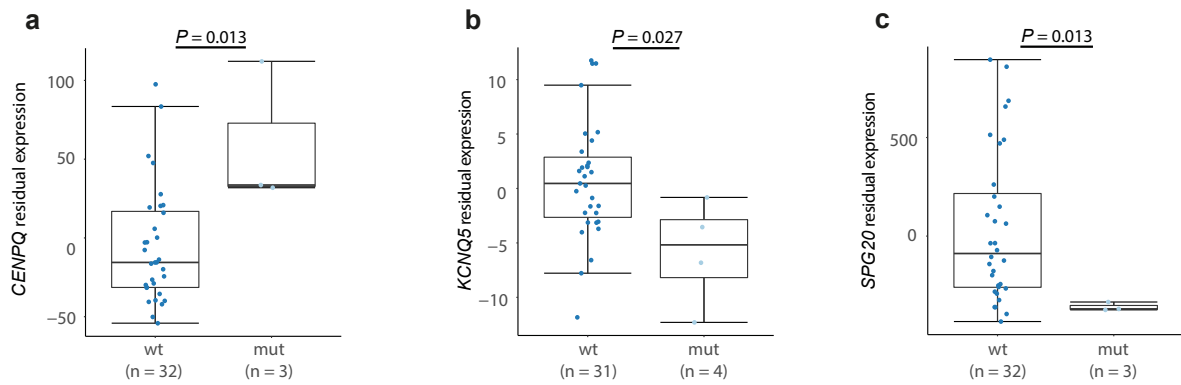

**Supplementary Figure 12** Correlation between CBS hotspot mutations and the residual expression of candidate genes after correcting for tumor purity and copy number. **(a-c)** The gene expressions of *CENPQ* **(a)**, *KCNQ5* **(b)** and *SPG20* **(c)** in tumors wildtype at the corresponding CBS hotspot and tumors mutated at the corresponding CBS hotspot. Wilcoxon rank-sum test *P*-values are shown.

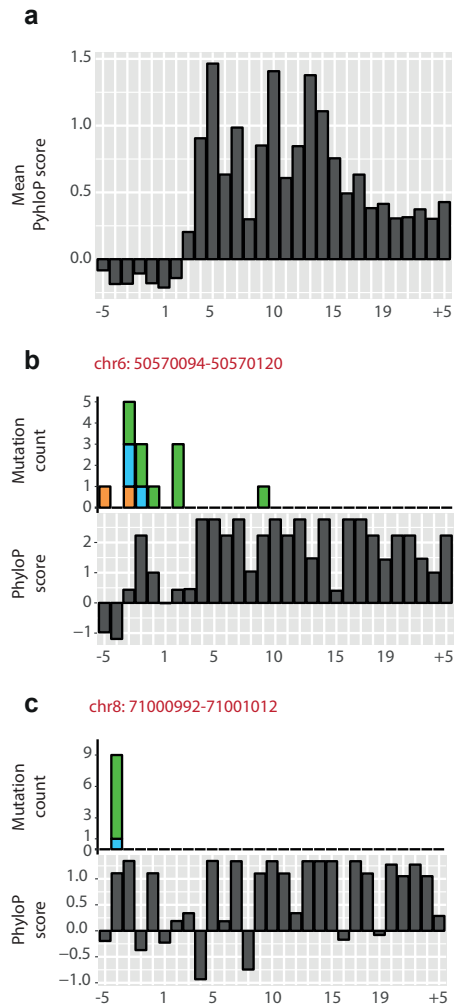

**Supplementary Figure 13** Evolutionary conservation of the consensus CTCF motif and flanking sequences. **(a)** Average PhyloP scores of the CTCF-binding motif and  $\pm 5$  flanking bases of all mutated CBSs. **(b-c)** Two CBS hotspots (b is hotspot upstream of *CENPQ*) where mutations at 5' flanks of CTCF-binding motifs coincide with conserved bases.

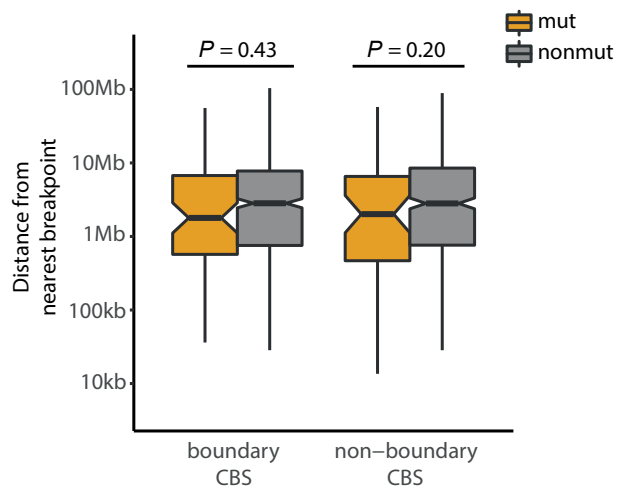

**Supplementary Figure 14** Distance to the nearest CNV breakpoint from CBSs at loop boundary and non-boundary CBSs for GS tumors. Wilcoxon rank-sum test  $P$ -values are shown.



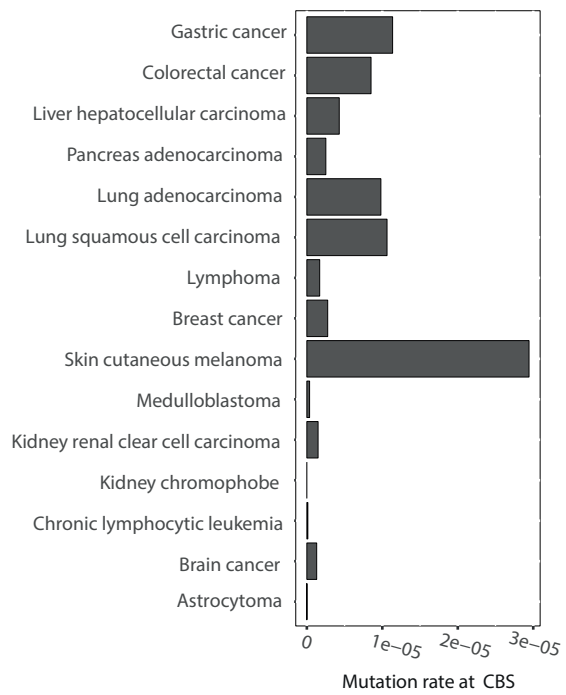

**Supplementary Figure 15** Mutation rate of tissue-specific CBSs in different cancer types.

**Supplementary Table 1. Indel hotspots. Significantly mutated non-coding indel hotspots identified by a genome-wide scan of 21-bp windows.**

| <b>Chr</b> | <b>Start</b> | <b>End</b> | <b><i>P</i>-value</b> | <b>Length</b> | <b># mutated samples</b> | <b>adjusted <i>P</i>-value</b> |
|------------|--------------|------------|-----------------------|---------------|--------------------------|--------------------------------|
| chr6       | 168136120    | 168136140  | 6.45E-16              | 21            | 4                        | 1.63E-06                       |
| chr6       | 41709379     | 41709409   | 1.93E-14              | 31            | 4                        | 4.90E-05                       |

**Supplementary Table 2. Genes enriched for non-coding indels**

| <b>Gene Name</b> | <b>Chr</b> | <b>Gene Start</b> | <b>Gene End</b> | <b>Gene Length</b> | <b># mutated samples</b> | <b><i>P</i>-value</b> | <b>Adjusted <i>P</i>-value</b> |
|------------------|------------|-------------------|-----------------|--------------------|--------------------------|-----------------------|--------------------------------|
| LIPF             | chr10      | 90424198          | 90438571        | 14807              | 16                       | 1.89E-17              | 6.39E-13                       |
| PGC              | chr6       | 41704449          | 41721847        | 16717              | 7                        | 6.17E-08              | 2.08E-03                       |
| MUC6             | chr11      | 1012821           | 1036706         | 17851              | 8                        | 4.92E-07              | 1.66E-02                       |

**Supplementary Table 3. SNV hotspots. Significantly mutated non-coding SNV hotspots identified by a genome-wide scan of 21-bp windows.**

| Chr   | Start     | End       | <i>P</i> -value | Length | # mutated samples | Adjusted <i>P</i> -value | Annotation    |
|-------|-----------|-----------|-----------------|--------|-------------------|--------------------------|---------------|
| chr6  | 50570094  | 50570120  | 5.40E-23        | 27     | 11                | 1.37E-13                 | CBS           |
| chr7  | 68391104  | 68391132  | 8.36E-19        | 29     | 9                 | 2.12E-09                 | intergenic    |
| chr8  | 71000992  | 71001012  | 1.09E-18        | 21     | 8                 | 2.75E-09                 | CBS           |
| chr7  | 136495924 | 136495948 | 6.73E-17        | 25     | 9                 | 1.71E-07                 | intergenic    |
| chr2  | 57627616  | 57627640  | 1.32E-16        | 25     | 8                 | 3.34E-07                 | intergenic    |
| chr1  | 209422184 | 209422222 | 1.94E-16        | 39     | 7                 | 4.90E-07                 | CBS           |
| chr2  | 49173770  | 49173816  | 4.05E-16        | 47     | 9                 | 1.03E-06                 | CBS           |
| chr2  | 239033350 | 239033370 | 1.32E-15        | 21     | 6                 | 3.35E-06                 | ESPNL intron  |
| chr4  | 182064578 | 182064613 | 3.09E-15        | 36     | 7                 | 7.83E-06                 | CBS           |
| chrX  | 104435106 | 104435140 | 4.26E-15        | 35     | 7                 | 1.08E-05                 | CBS           |
| chr16 | 8381278   | 8381302   | 4.44E-15        | 25     | 6                 | 1.13E-05                 | intergenic    |
| chr5  | 23824204  | 23824224  | 6.27E-15        | 21     | 8                 | 1.59E-05                 | intergenic    |
| chr7  | 67614923  | 67614943  | 7.42E-15        | 21     | 8                 | 1.88E-05                 | intergenic    |
| chr14 | 70285576  | 70285601  | 8.40E-15        | 26     | 6                 | 2.13E-05                 | CBS           |
| chr6  | 73122084  | 73122123  | 9.16E-15        | 40     | 7                 | 2.32E-05                 | CBS           |
| chr8  | 65161396  | 65161420  | 2.79E-14        | 25     | 7                 | 7.08E-05                 | intergenic    |
| chr7  | 4937707   | 4937736   | 5.80E-14        | 30     | 6                 | 1.47E-04                 | intergenic    |
| chr8  | 70576141  | 70576184  | 6.12E-14        | 44     | 8                 | 1.55E-04                 | CBS           |
| chr12 | 126996666 | 126996686 | 7.21E-14        | 21     | 7                 | 1.83E-04                 | intergenic    |
| chr1  | 153607104 | 153607124 | 1.24E-13        | 21     | 5                 | 3.13E-04                 | CHTOP intron  |
| chr4  | 5415060   | 5415082   | 1.39E-13        | 23     | 6                 | 3.52E-04                 | STK32B intron |
| chr16 | 13516145  | 13516165  | 1.87E-13        | 21     | 6                 | 4.73E-04                 | intergenic    |
| chrX  | 137405623 | 137405655 | 1.93E-13        | 33     | 7                 | 4.88E-04                 | intergenic    |
| chr13 | 36552821  | 36552860  | 2.57E-13        | 40     | 8                 | 6.51E-04                 | CBS           |
| chr4  | 62653076  | 62653096  | 2.68E-13        | 21     | 6                 | 6.80E-04                 | LPHN3 intron  |
| chr3  | 171164993 | 171165017 | 3.61E-13        | 25     | 5                 | 9.15E-04                 | TNIK intron   |
| chr4  | 144748744 | 144748764 | 4.17E-13        | 21     | 6                 | 1.06E-03                 | intergenic    |
| chr3  | 164903700 | 164903728 | 5.72E-13        | 29     | 7                 | 1.45E-03                 | CBS           |
| chr5  | 1472143   | 1472163   | 1.21E-12        | 21     | 5                 | 3.07E-03                 | LPCAT1 intron |
| chr9  | 25481736  | 25481758  | 1.44E-12        | 23     | 7                 | 3.66E-03                 | intergenic    |
| chr2  | 77150455  | 77150477  | 1.53E-12        | 23     | 6                 | 3.88E-03                 | LRRTM4 intron |
| chr3  | 104801455 | 104801477 | 2.12E-12        | 23     | 6                 | 5.38E-03                 | intergenic    |
| chrX  | 125548690 | 125548710 | 2.50E-12        | 21     | 6                 | 6.33E-03                 | intergenic    |
| chr14 | 83046706  | 83046744  | 3.82E-12        | 39     | 7                 | 9.67E-03                 | intergenic    |

**Supplementary Table 4. Recurrently mutated CBSs under the CBS-specific background model**

| <b>Chr</b> | <b>Start</b> | <b>End</b> | <b>P-value</b> | <b>Length</b> | <b># mutated samples</b> | <b>Adjusted P-value</b> |
|------------|--------------|------------|----------------|---------------|--------------------------|-------------------------|
| chr6       | 50570082     | 50570110   | 1.32E-14       | 29            | 11                       | 6.28E-10                |
| chr8       | 70576149     | 70576177   | 2.31E-14       | 29            | 8                        | 1.10E-09                |
| chr8       | 71000975     | 71001003   | 8.65E-14       | 29            | 8                        | 4.10E-09                |
| chr14      | 70285585     | 70285613   | 4.75E-13       | 29            | 7                        | 2.26E-08                |
| chr6       | 50570080     | 50570108   | 1.22E-12       | 29            | 10                       | 5.78E-08                |
| chr2       | 49173785     | 49173813   | 4.48E-11       | 29            | 8                        | 2.13E-06                |
| chrX       | 104435103    | 104435131  | 3.21E-10       | 29            | 7                        | 1.52E-05                |
| chr3       | 164903684    | 164903712  | 4.98E-10       | 29            | 7                        | 2.37E-05                |
| chr3       | 115533804    | 115533832  | 2.22E-09       | 29            | 5                        | 1.05E-04                |
| chr4       | 10556425     | 10556453   | 5.78E-09       | 29            | 6                        | 2.74E-04                |
| chr12      | 88242203     | 88242231   | 4.01E-08       | 29            | 5                        | 1.90E-03                |
| chr7       | 137139122    | 137139150  | 4.59E-08       | 29            | 6                        | 2.18E-03                |
| chr10      | 108384789    | 108384817  | 4.97E-08       | 29            | 5                        | 2.36E-03                |
| chr1       | 209422187    | 209422215  | 6.00E-08       | 29            | 7                        | 2.85E-03                |
| chr6       | 73122090     | 73122118   | 6.92E-08       | 29            | 7                        | 3.28E-03                |
| chr10      | 81134496     | 81134524   | 1.15E-07       | 29            | 4                        | 5.45E-03                |
| chr11      | 123349284    | 123349312  | 1.80E-07       | 29            | 5                        | 8.56E-03                |

**Supplementary Table 5. DeepBind analysis on hotspot mutations flanking CTCF-binding motifs**

| <b>Hotspot Location</b>  | <b>Mutation</b>    | <b>Sample ID</b> | <b>Motif creation</b> | <b>Motif disruption</b> |
|--------------------------|--------------------|------------------|-----------------------|-------------------------|
| chr2: 49173777-49173807  | chr2:49173789 T>G  | apollo10         | ATF2                  | -                       |
| chr2: 49173777-49173807  | chr2:49173789 T>G  | HK-pfg146        | ATF2                  | -                       |
| chr2: 49173777-49173807  | chr2:49173789 T>G  | tan980437        | ATF2                  | -                       |
| chr13: 36552830-36552850 | chr13 36552831 A>T | HK-pfg054        | RCOR1                 | -                       |
| chr13: 36552830-36552850 | chr13:36552831 A>T | tan76629543      | RCOR1                 | -                       |
| chr14: 70285576-70285601 | chr14:70285588 T>G | HK-pfg092        | -                     | SIN3A                   |
| chr14: 70285576-70285601 | chr14:70285588 T>G | HK-pfg344        | -                     | SIN3A                   |
| chr14: 70285576-70285601 | chr14:70285588 T>G | TCGA-D7-6528     | -                     | SIN3A                   |

**Supplementary Table 6. CBS hotspot mutations identified in previous genome-wide studies of gastrointestinal tumors and the COSMIC database.**

| Chr   | Start     | End       | # mut in COSMIC | # mut in Katainen et al. | # mut in Umer et al. | Cancer types                       |
|-------|-----------|-----------|-----------------|--------------------------|----------------------|------------------------------------|
| chr6  | 50570094  | 50570120  | 12              | 15                       | 0                    | BRCA, CRC, ESAD, GC, PACA          |
| chr8  | 71000992  | 71001012  | 5               | 6                        | 0                    | CRC, ESAD, HCC, LYMP               |
| chr1  | 209422184 | 209422222 | 1               | 0                        | 0                    | BRCA, CRC                          |
| chr2  | 49173770  | 49173816  | 24              | 4                        | 6                    | CRC, ESAD, HCC, PACA, PRAD, OV     |
| chr4  | 182064578 | 182064613 | 5               | 6                        | 3                    | GC, HCC                            |
| chrX  | 104435106 | 104435140 | 6               | 5                        | 0                    | BRCA, CRC, ESAD, GC, PACA          |
| chr14 | 70285576  | 70285601  | 2               | 0                        | 0                    | CRC, ESAD                          |
| chr6  | 73122084  | 73122123  | 16              | 9                        | 7                    | BRCA, GC, ESAD, HCC, PACA          |
| chr8  | 70576141  | 70576184  | 10              | 0                        | 2                    | BRCA, ESAD, GC, HCC, LYMP, PACA    |
| chr13 | 36552821  | 36552860  | 11              | 6                        | 0                    | BRCA, ESAD, GC, HCC, KC, OV, PACA, |
| chr3  | 164903700 | 164903728 | 11              | 0                        | 0                    | ESAD, GC, HCC, LYMP, PACA          |

**Legend**

**# mut in COSMIC:** Number of confirmed somatic mutations at CBS hotspots in COSMICv83

**# mut in Katainen et al.:** mutation clusters identified by Katainen et al. (Table S4)

**# mut in Umer et al.:** CBSs with at least 2 motif breaking mutations from Table S5 of Umer et al.

Katainen et al. studied colorectal cancer; Umer et al. studied liver, gastric, esophageal and pancreatic cancers

**Cancer types: cancer types with mutations at CBS hotspots identified in previous studies**

BRCA Breast cancer  
 CRC Colorectal cancer  
 ESAD Esophageal cancer  
 GC Gastric cancer  
 HCC Hepatocellular carcinoma  
 KC Kidney cancer  
 LYMP lymphoid neoplasm  
 OV Ovarian cancer  
 PACA Pancreatic cancer  
 PRAD Prostate cancer
