# Supplementary material for: Mutation hotspots at CTCF binding sites coupled to chromosomal instability in gastrointestinal cancers
Source: PubMed Central journal article supplement (PMC5906695; doi:10.1038/s41467-018-03828-2), 2018-04-18
Supplement: 41467_2018_3828_MOESM3_ESM.pdf [file 41467_2018_3828_MOESM3_ESM.pdf]

## **Description of Additional Supplementary Files**

File Name: Supplementary Data 1

Description: Clinical and WGS data of the 212 gastric cancer tumors.

File Name: Supplementary Data 2

Description: Epigenetic features for LASSO selection.

File Name: Supplementary Data 3

Description: Final set of SNV calls used for analysis.

File Name: Supplementary Data 4

Description: Final set of indel calls used for analysis.

File Name: Supplementary Data 5

Description: R markdown documents of all figures. Data files for the markdowns are available on request.
